# Supplementary material for: Fructose-coated Angstrom silver inhibits osteosarcoma growth and metastasis via promoting ROS-dependent apoptosis through the alteration of glucose metabolism by inhibiting PDK
Source: PubMed Central journal article supplement (PMC7359101; doi:10.7150/thno.45858), 2020-06-19
Supplement: thnov10p7710s1.pdf [file thnov10p7710s1.pdf]

## Supporting Information

### **Fructose-coated Ångstrom silver inhibits osteosarcoma growth and metastasis via promoting ROS-dependent apoptosis through the alteration of glucose metabolism by inhibiting PDK**

*Xiong-Ke Hu, Shan-Shan Rao, Yi-Juan Tan, Hao Yin, Ming-Jie Luo, Zhen-Xing Wang, Jin-Hua Zhou, Chun-Gu Hong, Zhong-Wei Luo, Wei Du, Ben Wu, Zi-Qi Yan, Ze-Hui He, Zheng-Zhao Liu, Jia Cao, Yang Wang, Wei-Yi Situ, Hao-Ming Liu, Jie Huang, Yi-Yi Wang, Kun Xia, Yu-Xuan Qian, Yan Zhang, Tao Yue, Yi-Wei Liu, Hong-Qi Zhang, Si-Yuan Tang, Chun-Yuan Chen\*, Hui Xie\**

\* Corresponding authors: Hui Xie (huixie@csu.edu.cn); Chun-Yuan Chen (chency19@csu.edu.cn).

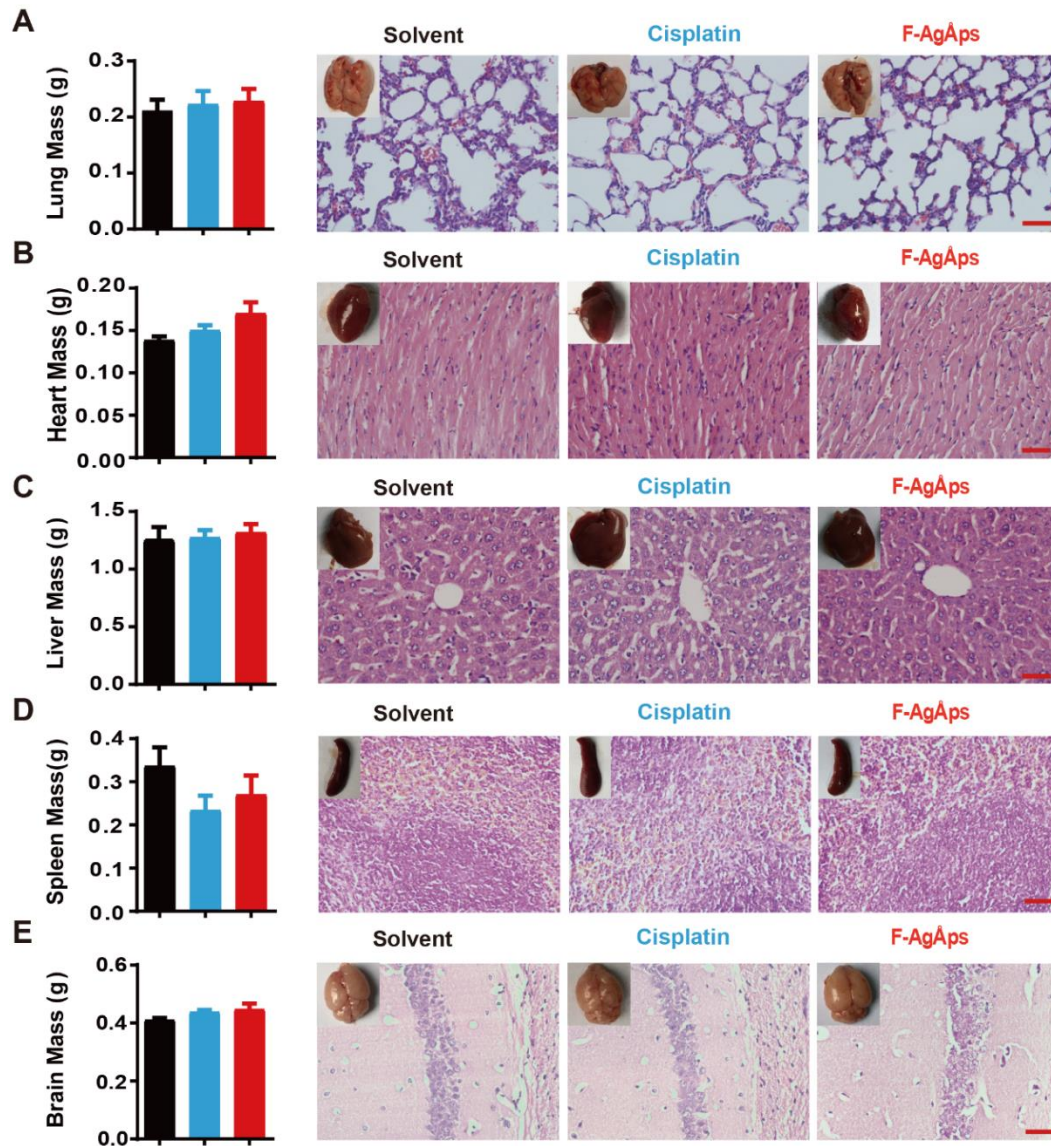

**Figure S1. No obvious toxicities are induced in osteosarcoma-bearing mice after intravenous injection of F-AgAps.** (A-E) Weights, gross observation and H&E staining images of lung (A), heart (B), liver (C), spleen (D) and brain (E) in subcutaneous 143B xenograft-bearing mice treated with solvent, F-AgAps or cisplatin for 21 days. Scale bar: 100  $\mu$ m.  $n = 6$  per group. Scale bar: 100  $\mu$ m. Data are shown as mean  $\pm$  SD. \* $P < 0.05$ , \*\* $P < 0.01$ , \*\*\* $P < 0.001$ .

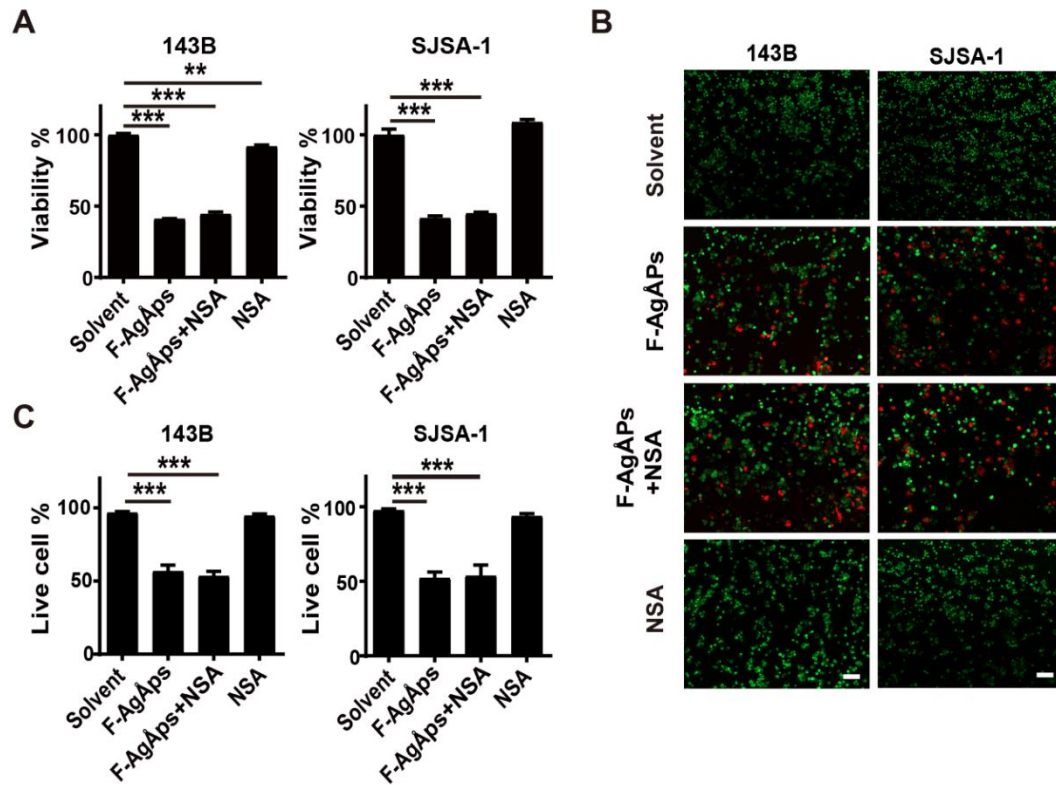

**Figure S2. Pyroptosis is not involved in F-AgAPs-induced osteosarcoma cell death.**

(A) CCK-8 analysis of the viability of 143B and SJSA-1 treated with solvent, F-AgAPs, NSA or F-AgAPs + NSA for 24 h. NSA: necrosulfonamide.  $n = 5$  per group. (B) Representative images of calcein-AM/PI staining of 143B and SJSA-1 receiving different treatments for 24 h. Scale bar: 100  $\mu\text{m}$ . (C) Quantification of the percentages of live cells in (B).  $n = 3$  per group. Data are shown as mean  $\pm$  SD. \* $P < 0.05$ , \*\* $P < 0.01$ , \*\*\* $P < 0.001$ .

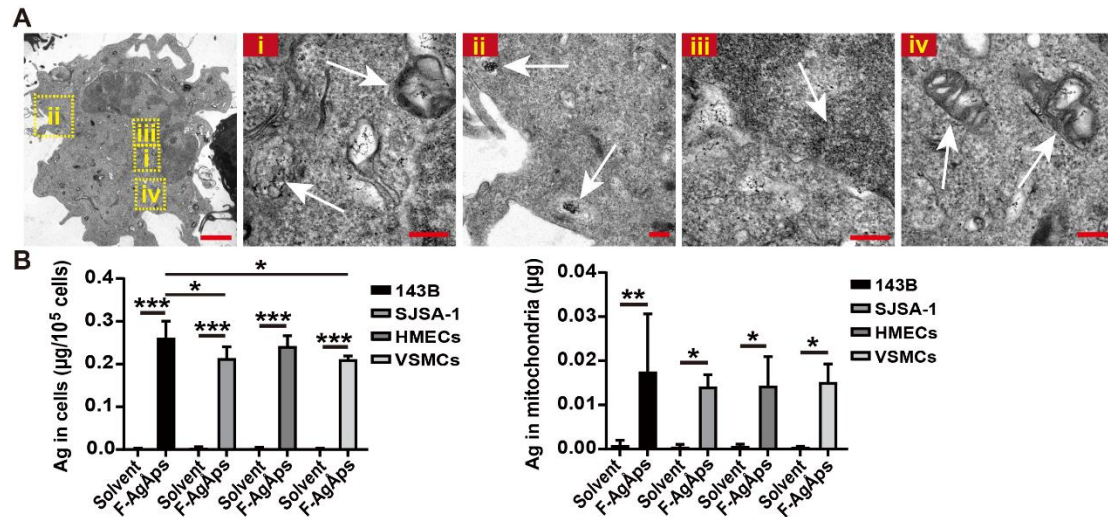

**Figure S3. Internalization of F-AgAPs by osteosarcoma cells and healthy cells. (A)**

Representative transmission electron microscopy images of 143B treated with F-AgAPs for 24 h. White arrows indicate the accumulation of F-AgAPs in cellular endosomes (i), lysosomes (ii), nucleus (iii) and mitochondria (iv). Scale bar: 2 μm. (B)

Silver levels in cell lysates and mitochondria of 143B, SJSA-1, VMSCs and HMECs treated with solvent or F-AgAPs for 24 h were measured by ICP-MS. *n* = 4 per group.

Data are shown as mean ± SD. \**P* < 0.05, \*\**P* < 0.01, \*\*\**P* < 0.001.

**Table S1 Hematologic indexes in mice treated with solvent, cisplatin and F-AgÅPs.**

| Hematologic indexes                        | Solvent        | Cisplatin       | F-AgÅPs        |
|--------------------------------------------|----------------|-----------------|----------------|
| Red blood cells (RBC) 10 <sup>12</sup> /L  | 7.19 ± 0.33    | 6.21 ± 1.67     | 7.48 ± 0.23    |
| Hemoglobin (HGB) g/L                       | 113.80 ± 1.79  | 96.00 ± 25.85   | 116.00 ± 3.61  |
| Hematokrit (HCT) %                         | 35.56 ± 0.93   | 29.18 ± 7.84    | 35.42 ± 1.03   |
| White blood cells (WBC) 10 <sup>9</sup> /L | 12.96 ± 4.85   | 14.14 ± 1.99    | 12.28 ± 4.41   |
| Platelets (PLT) 10 <sup>9</sup> /L         | 560.00 ± 96.09 | 515.60 ± 164.30 | 631.00 ± 56.45 |
| Neutrophil (NEUT%) %                       | 8.28 ± 2.72    | 14.76 ± 5.72    | 16.34 ± 8.78   |
| Lymphocytes (LYMPH%) %                     | 83.70 ± 2.08   | 80.28 ± 4.70    | 76.62 ± 8.72   |
| Monocyte (MONO%) %                         | 6.72 ± 3.30    | 4.18 ± 2.39     | 5.48 ± 3.47    |

*n* = 5 per group. Data are shown as mean ± SD.
